# Supplementary material for: Therapeutic Effect of Novel Single-Stranded RNAi Agent Targeting Periostin in Eyes with Retinal Neovascularization
Source: PubMed Central journal article supplement — Mol Ther Nucleic Acids. 2017 Feb 9;6:279–89. doi: 10.1016/j.omtn.2017.01.004 (PMC5363510; doi:10.1016/j.omtn.2017.01.004), 2017-02-09
Supplement: mmc1.pdf [file mmc1.pdf]

OMTN, Volume 6

## **Supplemental Information**

### **Therapeutic Effect of Novel Single-Stranded**

### **RNAi Agent Targeting Periostin in Eyes**

### **with Retinal Neovascularization**

**Takahito Nakama, Shigeo Yoshida, Keijiro Ishikawa, Yuki Kubo, Yoshiyuki Kobayashi, Yedi Zhou, Shintaro Nakao, Toshio Hisatomi, Yasuhiro Ikeda, Kazumasa Takao, Kazunori Yoshikawa, Akira Matsuda, Junya Ono, Shoichiro Ohta, Kenji Izuhara, Akira Kudo, Koh-hei Sonoda, and Tatsuro Ishibashi**

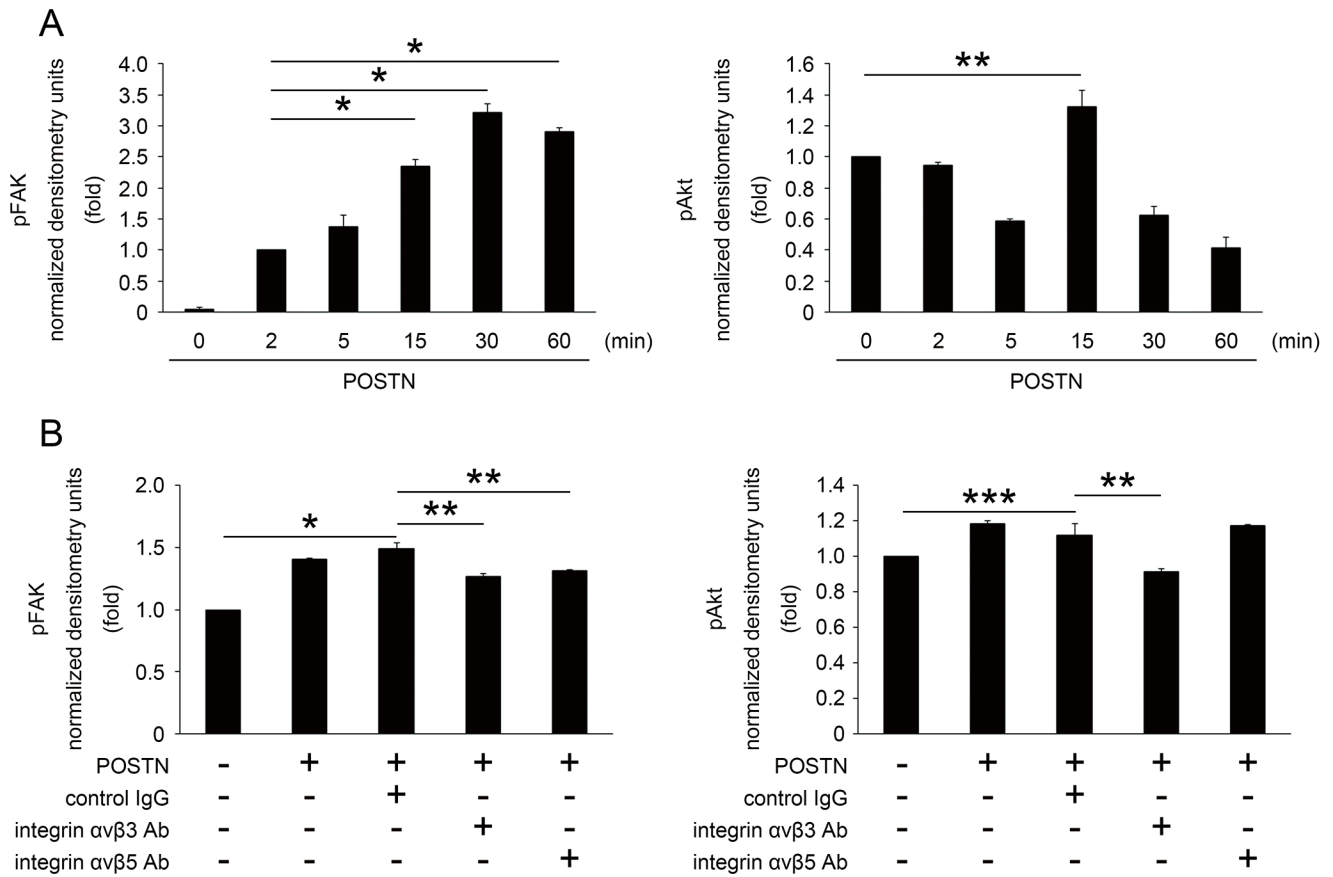

**Supplementary Figure 1. Densitometric quantitation of blots of FAK/Akt phosphorylation in Figure 4A and B.**

Densitometry was quantified from three independent experiments and normalized by  $\beta$ -actin.

A: FAK/Akt phosphorylation was significantly increased at 15 minutes after POSTN stimulation in HRECs.

\*P < 0.0001, \*\*P < 0.01.

B: FAK/Akt phosphorylation was significantly reduced by inhibition of integrin  $\alpha v \beta 3$ , whereas inhibition of

integrin  $\alpha v \beta 5$  had no significant influence on the Akt phosphorylation. \*P < 0.0001, \*\*P < 0.01, \*\*\*P < 0.05.
